# Supplementary material for: Post-mortem Nasopharyngeal Microbiome Analysis of Zambian Infants with and without Respiratory Syncytial Virus Disease: A Nested Case Control Study
Source: bioRxiv or medRxiv preprint supplement (doi:10.1101/2022.12.23.22283745), 2022-12-26
Supplement: Supplementary file [file media-1.pdf]

## Species Level Bray-Curtis Dissimilarity Index for RSV+ and RSV- Decedents

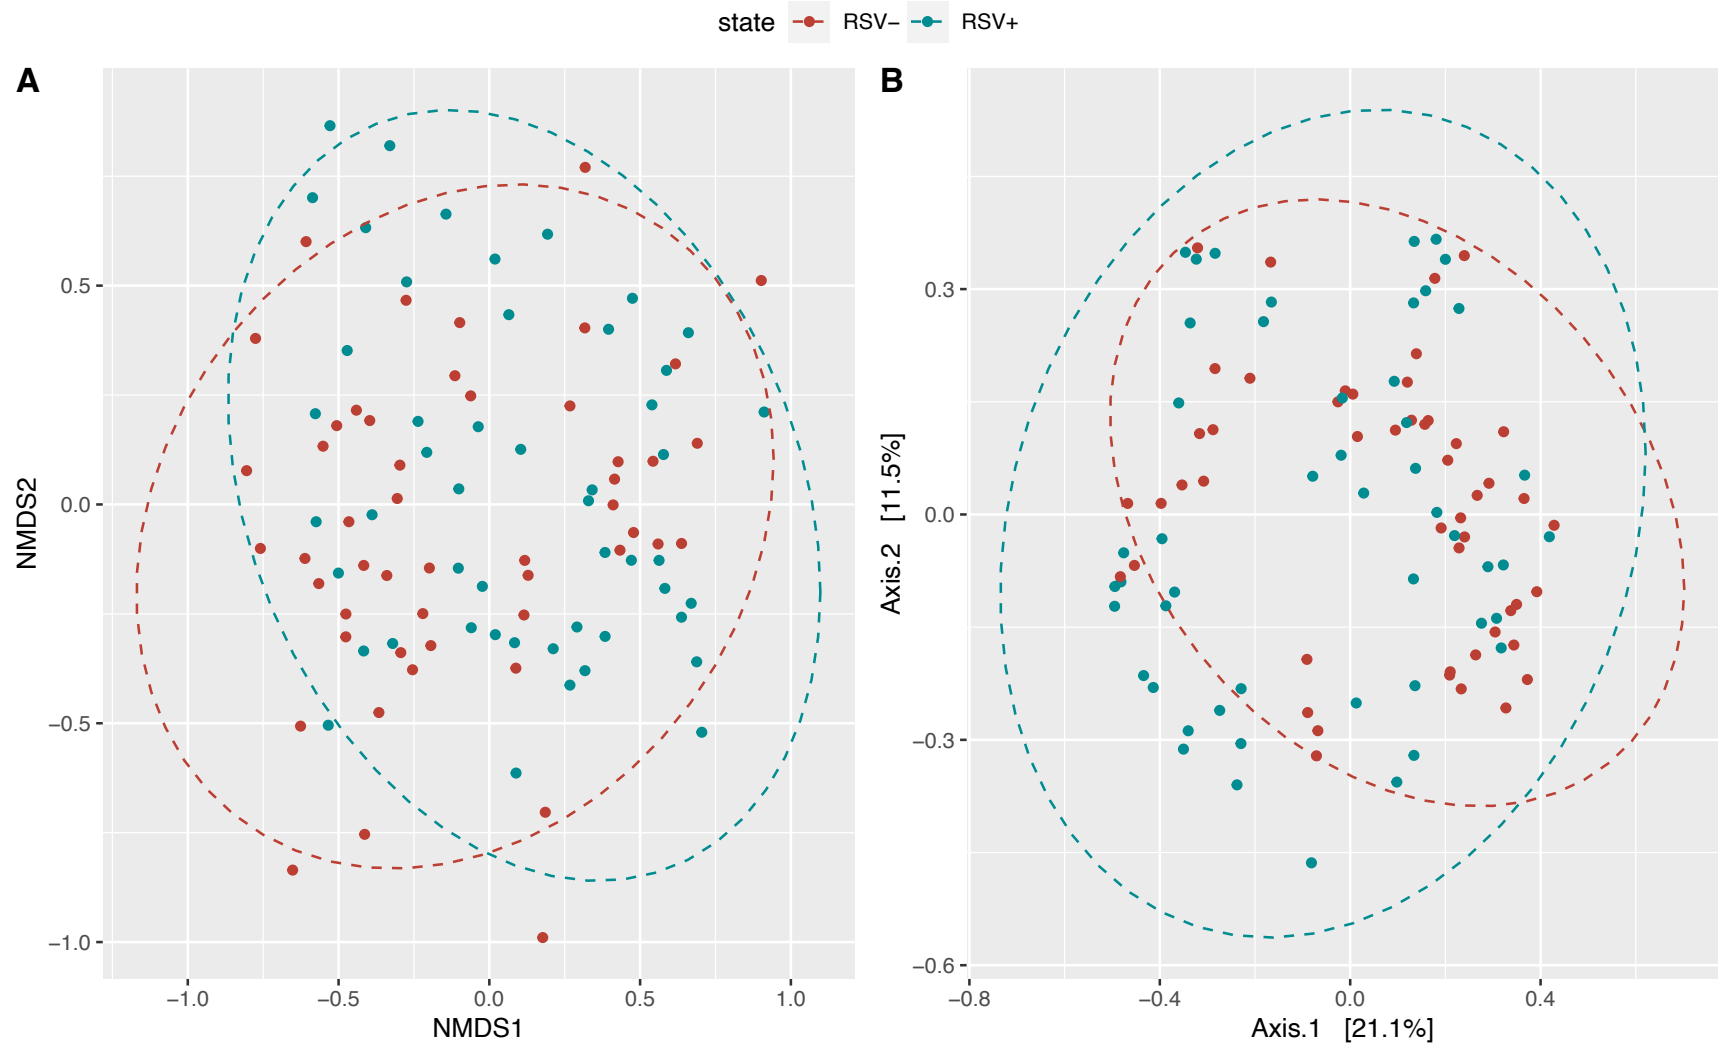

**Figure, Supplemental Digital Content 3** Species analyses displaying the Bray Curtis dissimilarity index between RSV+ and RSV- infants. **A)** NMDS overlap between RSV+ and RSV- samples with a stress value of 0.262 showing very little distinct clustering. **B)** PCoA indicating some unique clustering of RSV+ in bottom left-hand corner.
