# Supplementary material for: Post-mortem Nasopharyngeal Microbiome Analysis of Zambian Infants with and without Respiratory Syncytial Virus Disease: A Nested Case Control Study
Source: bioRxiv or medRxiv preprint supplement (doi:10.1101/2022.12.23.22283745), 2022-12-26
Supplement: Supplementary file [file media-2.pdf]

**p-values and Adjusted p-values for Differential Abundance Analysis at Genus Level**

| <b>Genera</b>                | <b>p-value</b> | <b>Adjusted p-value</b> |
|------------------------------|----------------|-------------------------|
| <i>Acinetobacter</i>         | 0.885          | 0.969                   |
| <i>Aeromonas</i>             | 0.447          | 0.838                   |
| <i>Alloprevotella</i>        | 0.829          | 0.969                   |
| <i>Bacillus</i>              | 0.747          | 0.969                   |
| <i>Bifidobacterium</i>       | 0.889          | 0.969                   |
| <i>Citrobacter</i>           | 0.973          | 0.978                   |
| <i>Clostridium</i>           | 0.978          | 0.978                   |
| <i>Corynebacterium</i>       | 0.871          | 0.969                   |
| <i>Dolosigranulum</i>        | 0.267          | 0.705                   |
| <i>Enterobacter</i>          | 0.124          | 0.446                   |
| <i>Escherichia</i>           | 0.117          | 0.446                   |
| <i>Fusobacterium</i>         | 0.274          | 0.705                   |
| <i>Gemella</i>               | 0.02**         | 0.24                    |
| <i>Granulicatella</i>        | 0.08           | 0.446                   |
| <i>Haemophilus</i>           | 0.059          | 0.425                   |
| <i>Klebsiella</i>            | 0.393          | 0.838                   |
| <i>Lacrimispora</i>          | 0.565          | 0.838                   |
| <i>Lactobacillus</i>         | 0.915          | 0.969                   |
| <i>Lactococcus</i>           | 0.519          | 0.838                   |
| <i>Ligilactobacillus</i>     | 0.141          | 0.461                   |
| <i>Limosilactobacillus</i>   | 0.582          | 0.838                   |
| <i>Moraxella</i>             | 0.006***       | 0.216                   |
| <i>Mycoplasma</i>            | 0.426          | 0.838                   |
| <i>Neisseria</i>             | 0.508          | 0.838                   |
| <i>Other</i>                 | 0.357          | 0.838                   |
| <i>Porphyromonas</i>         | 0.11           | 0.446                   |
| <i>Prevotella</i>            | 0.551          | 0.838                   |
| <i>Pseudomonas</i>           | 0.707          | 0.969                   |
| <i>Pseudostreptobacillus</i> | 0.877          | 0.969                   |
| <i>Rothia</i>                | 0.268          | 0.705                   |
| <i>Serratia</i>              | 0.486          | 0.838                   |
| <i>Sneathia</i>              | 0.547          | 0.838                   |
| <i>Staphylococcus</i>        | 0.018**        | 0.24                    |
| <i>Streptococcus</i>         | 0.051          | 0.425                   |
| <i>Ureaplasma</i>            | 0.793          | 0.969                   |
| <i>Veillonella</i>           | 0.099          | 0.446                   |

**Table, Supplemental Digital Content 2.** Table of Wilcoxon rank sum test p-values testing RSV status differences with a Benjamini-Hochberg multiple testing adjustment. Significant values are marked with \*\*\*  $p < 0.01$ , \*\*  $p < 0.03$ , \*  $p < 0.05$ .
