# Supplementary material for: Post-mortem Nasopharyngeal Microbiome Analysis of Zambian Infants with and without Respiratory Syncytial Virus Disease: A Nested Case Control Study
Source: bioRxiv or medRxiv preprint supplement (doi:10.1101/2022.12.23.22283745), 2022-12-26
Supplement: Supplementary file [file media-3.pdf]

## Species Level Heatmap of Differential Abundance

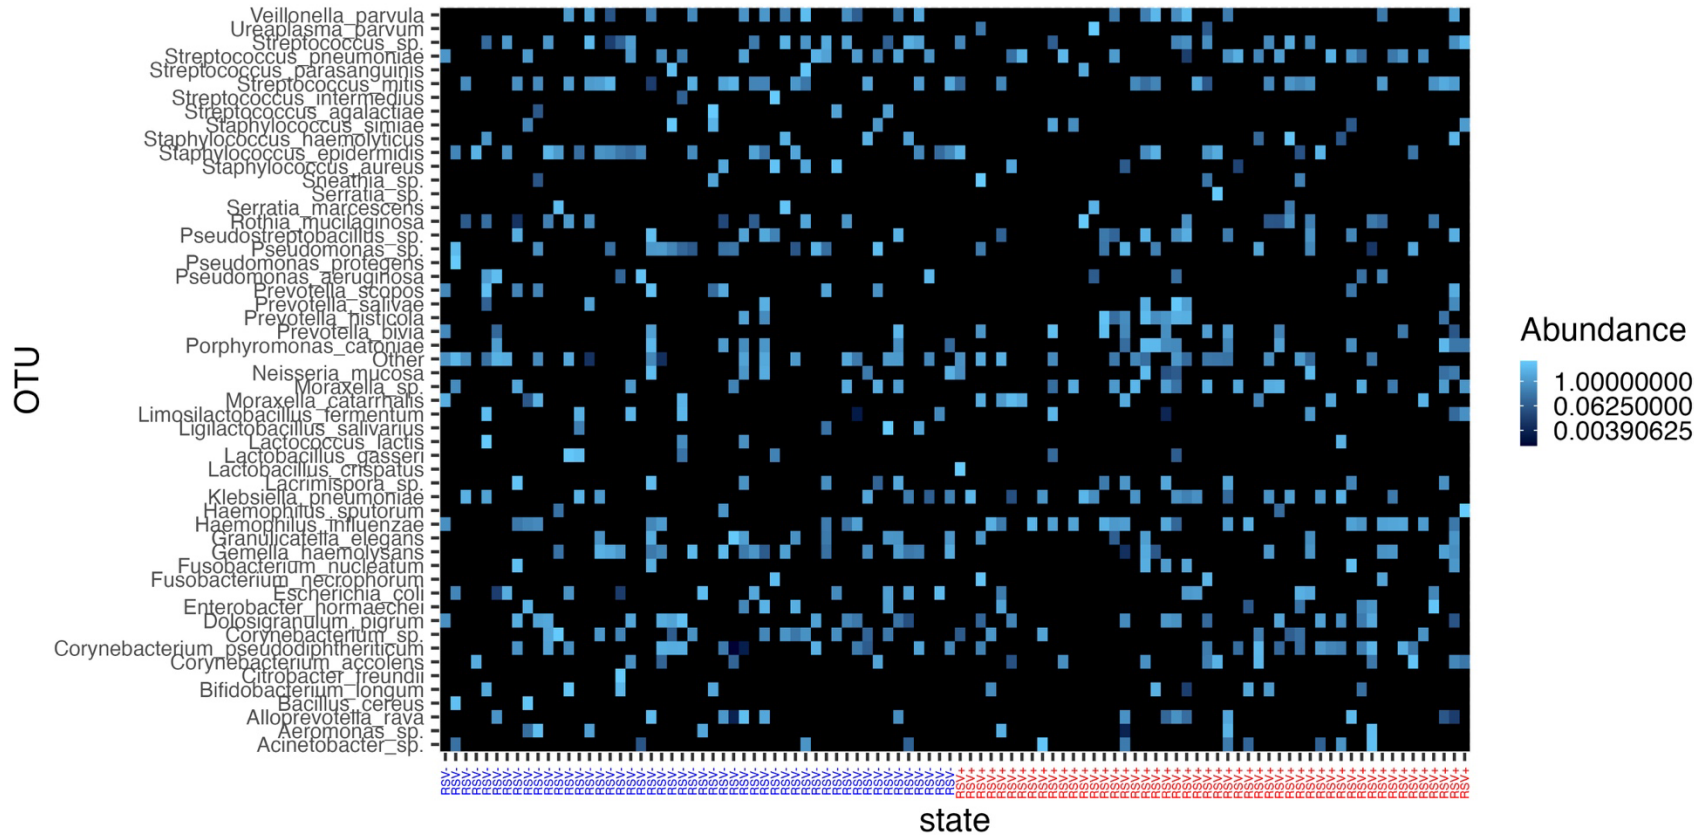

**Figure, Supplemental Digital Content 4.** Heatmap showing species differential abundance comparison. Note differences for *Corynebacterium accolens*, *Gemella haemolysans*, *Moraxella sp.*, and *Prevotella scopos*.
