# Supplementary material for: Post-mortem Nasopharyngeal Microbiome Analysis of Zambian Infants with and without Respiratory Syncytial Virus Disease: A Nested Case Control Study
Source: bioRxiv or medRxiv preprint supplement (doi:10.1101/2022.12.23.22283745), 2022-12-26
Supplement: Supplementary file [file media-4.pdf]

## PICRUSt Pathway Abundance Analysis Significant Results

| Pathway                                                                | Taxa w/pathway (per MetaCyc)                                                                                                                                                                                                                                                                                                                                                                                                                                              | Adjusted p-value |
|------------------------------------------------------------------------|---------------------------------------------------------------------------------------------------------------------------------------------------------------------------------------------------------------------------------------------------------------------------------------------------------------------------------------------------------------------------------------------------------------------------------------------------------------------------|------------------|
| 6-hydroxymethyl-dihydropterin diphosphate biosynthesis III (Chlamydia) | <i>Chlamydia trachomatis</i>                                                                                                                                                                                                                                                                                                                                                                                                                                              | 0.029            |
| 8-amino-7-oxononanoate biosynthesis I                                  | <i>Candidatus Nitrososphaera gargensis Ga9.2</i><br><i>Escherichia coli K-12 substr. MG1655</i><br><i>Francisella tularensis novicida U112</i><br><b><i>Haemophilus influenzae Rd KW20</i></b><br><b><i>Helicobacter pylori 26695</i></b><br><i>Mycobacterium tuberculosis H37Rv</i><br><i>Prochlorococcus marinus MIT 9211</i>                                                                                                                                           | 0.007            |
| biotin biosynthesis I                                                  | <i>Escherichia coli K-12 substr. MG1655</i><br><i>Francisella tularensis novicida U112</i><br><b><i>Haemophilus influenzae Rd KW20</i></b><br><b><i>Helicobacter pylori 26695</i></b><br><i>Prochlorococcus marinus MIT 9211</i>                                                                                                                                                                                                                                          | 0.007            |
| CMP-3-deoxy-D-manno-octulosonate biosynthesis I                        | <i>Arabidopsis thaliana col</i><br><i>Escherichia coli BL21(DE3)</i><br><i>Escherichia coli K-12 substr. MG1655</i><br><i>Zea mays</i>                                                                                                                                                                                                                                                                                                                                    | 0.003            |
| flavin biosynthesis I (bacteria and plants)                            | <i>Arabidopsis thaliana col</i><br><i>Bacillus subtilis</i><br><i>Escherichia coli K-12 substr. MG1655</i>                                                                                                                                                                                                                                                                                                                                                                | 0.029            |
| fucose degradation                                                     | <i>Escherichia coli K-12 substr. MG1655</i>                                                                                                                                                                                                                                                                                                                                                                                                                               | 0.045            |
| Kdo transfer to lipid IVA III (Chlamydia)                              | <i>Chlamydia pneumoniae</i><br><i>Chlamydia psittaci</i><br><i>Chlamydia psittaci 6BC</i>                                                                                                                                                                                                                                                                                                                                                                                 | 0.003            |
| L-lysine biosynthesis I                                                | <i>Arthrobacter globiformis</i><br><i>Azotobacter vinelandii</i><br><i>Bordetella pertussis</i><br><i>Corynebacterium glutamicum</i><br><i>Corynebacterium glutamicum ATCC 13032</i><br><i>Escherichia coli K-12 substr. MG1655</i><br><b><i>Haemophilus influenzae</i></b><br><b><i>Haemophilus influenzae Rd KW20</i></b><br><i>Helicobacter pylori</i><br><i>Mycobacterium tuberculosis</i><br><i>Mycobacterium tuberculosis H37Rv</i><br><i>Rhodospirillum rubrum</i> | 0.034            |
| L-lysine biosynthesis VI                                               | <i>Arabidopsis thaliana col</i><br><i>Chlamydia trachomatis</i><br><i>Glycine max</i><br><i>Methanocaldococcus jannaschii</i><br><i>Methanothermobacter thermautotrophicus</i><br><i>Nicotiana tabacum</i><br><i>Synechocystis</i><br><i>Zea mays</i>                                                                                                                                                                                                                     | 0.026            |
| lipid IVA biosynthesis                                                 | <i>Caulobacter vibrioides NA1000</i><br><i>Escherichia coli K-12 substr. MG1655</i>                                                                                                                                                                                                                                                                                                                                                                                       | 0.003            |
| methylerythritol phosphate pathway I                                   | <i>Brucella abortus</i><br><i>Escherichia coli K-12 substr. MG1655</i>                                                                                                                                                                                                                                                                                                                                                                                                    | 0.005            |
| methylerythritol phosphate pathway II                                  | <i>Arabidopsis thaliana col</i><br><i>Botryococcus braunii</i><br><i>Croton stellatopilosus</i><br><i>Plasmodium falciparum</i><br><i>Plasmodium falciparum HB3</i><br><i>Solanum lycopersicum</i><br><i>Thermosynechococcus vestitus BP-1</i>                                                                                                                                                                                                                            | 0.005            |

|                                                              |                                                                                                                                     |       |
|--------------------------------------------------------------|-------------------------------------------------------------------------------------------------------------------------------------|-------|
| mycolate biosynthesis                                        | <i>Mycobacterium tuberculosis H37Rv</i>                                                                                             | 0.023 |
| NAD salvage pathway II                                       | <i>Escherichia coli K-12 substr. MG1655</i><br><i>Salmonella enterica enterica serovar Typhimurium</i>                              | 0.009 |
| oleate biosynthesis IV (anaerobic)                           | <i>Aerococcus viridans</i><br><i>Cereibacter sphaeroides 2.4.1</i><br><i>Clostridium beijerinckii</i>                               | 0.023 |
| palmitate biosynthesis II (bacteria and plants)              | <i>Arabidopsis thaliana col</i><br><i>Brassica napus</i><br><i>Escherichia coli K-12 substr. MG1655</i><br><i>Spinacia oleracea</i> | 0.025 |
| palmitoleate biosynthesis I (from (5Z)-dodec-5-enoate)       | <i>Escherichia coli K-12 substr. MG1655</i><br><i>Helicobacter pylori 26695</i>                                                     | 0.003 |
| stearate biosynthesis II (bacteria and plants)               | <i>Arabidopsis thaliana col</i><br><i>Brassica napus</i><br><i>Spinacia oleracea</i>                                                | 0.012 |
| superpathway of (Kdo)2-lipid A biosynthesis                  | <i>Escherichia coli K-12 substr. MG1655</i>                                                                                         | 0.028 |
| superpathway of fatty acid biosynthesis initiation (E. coli) | <i>Escherichia coli K-12 substr. MG1655</i>                                                                                         | 0.030 |

**Table, Supplemental Digital Content 5.** PICRUSt2 inferred pathways and associated species. These pathway abundances are all significantly different between RSV+ and RSV- samples. Species identified as being differentially expressed in RSV+ and RSV- decedents in our differential abundance analysis are bolded.
